# Supplementary material for: Coal dust nanoparticles induced pulmonary fibrosis by promoting inflammation and epithelial-mesenchymal transition via the NF-κB/NLRP3 pathway driven by IGF1/ROS-mediated AKT/GSK3β signals
Source: Springer Nature journal article supplement (doi:10.1038/s41420-022-01291-z), 2022-12-29
Supplement: MOESM1 [file 41420_2022_1291_MOESM1_ESM.pdf]

Coal dust nanoparticles induced pulmonary fibrosis by promoting inflammation and epithelial-mesenchymal transition via the NF- $\kappa$ B/NLRP3 pathway driven by IGF1/ROS-mediated AKT/GSK3 $\beta$  signals

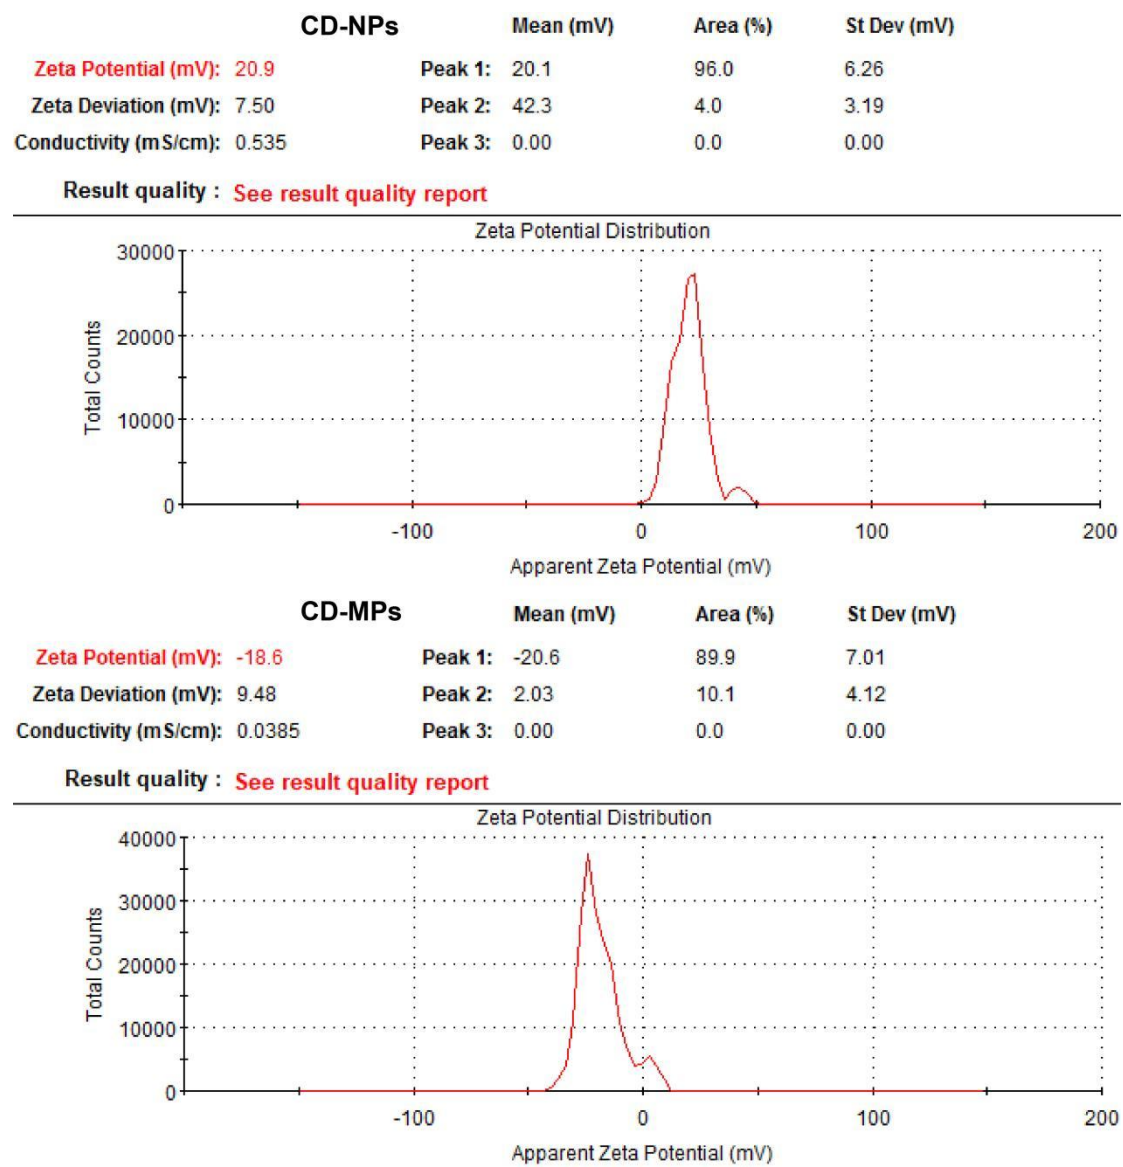

**Figure S1** The Zeta potential of CD-MPs and CD-NPs were measured with a Malvern Nanoparticle Size Potentiometer.

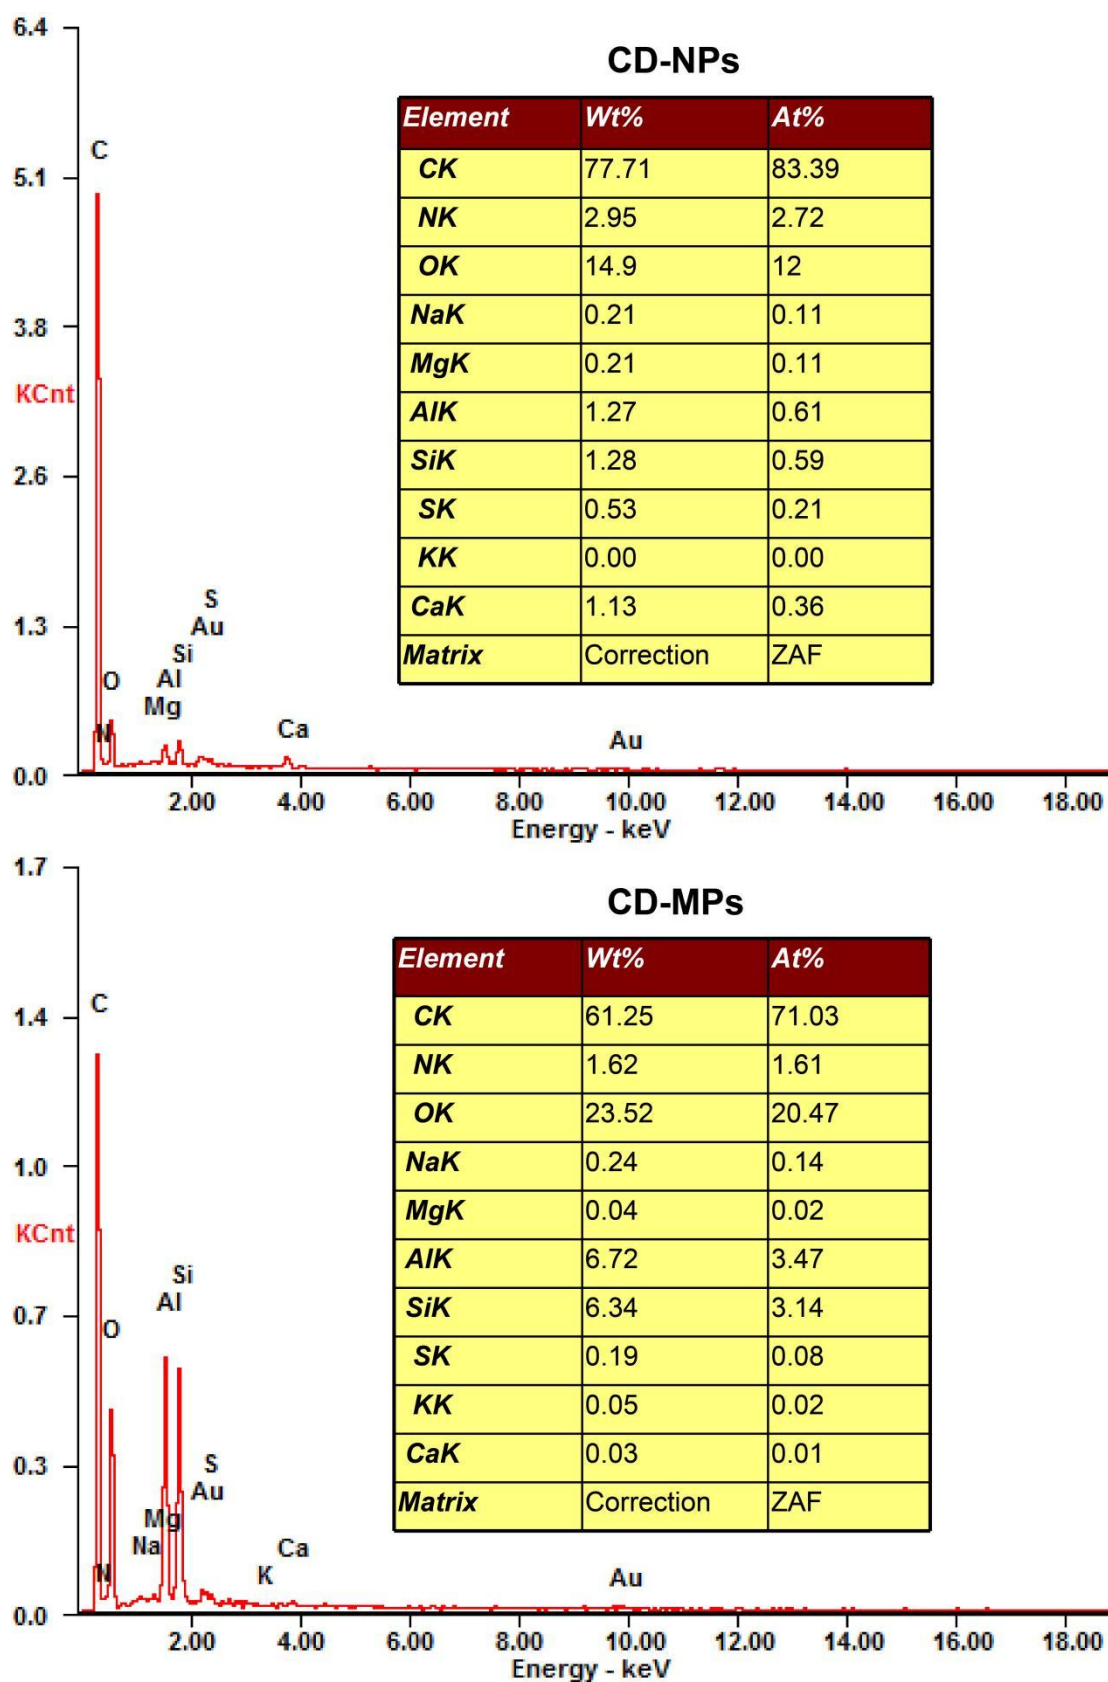

**Figure S2** The elemental composition of CD-NPs was analyzed with energy X-ray spectrometer (EDAX-GENESIS, USA) at 20 keV with an analysis area of 1.56  $\mu\text{m}^2$ .
